# Supplementary material for: Blockade of Human α7 Nicotinic Acetylcholine Receptor by α-Conotoxin ImI Dendrimer: Insight from Computational Simulations
Source: PubMed Central journal article supplement (PMC6563025; doi:10.3390/md17050303), 2019-05-23
Supplement: marinedrugs-17-00303-s001.pdf [file marinedrugs-17-00303-s001.pdf]

# Blockade of Human $\alpha 7$ Nicotinic Acetylcholine Receptor by $\alpha$ -Conotoxin ImI Dendrimer: Insight from Computational Simulations

## Supplementary Materials

Xiaoxiao Xu<sup>1,2</sup>, Jiazhen Liang<sup>1,2</sup>, Zheyu Zhang<sup>1</sup>, Tao Jiang<sup>1,2</sup> and Rilei Yu<sup>1,2,3\*</sup>

<sup>1</sup> Key Laboratory of Marine Drugs, Chinese Ministry of Education, School of Medicine and Pharmacy, Ocean University of China, Qingdao 266003, China; 21170831073@stu.ouc.edu.cn (X.X.); 11180822010@stu.ouc.edu.cn (J.L.); zzy8617@stu.ouc.edu.cn (Z.Z.); jiangtao@ouc.edu.cn (T.J.)

<sup>2</sup> Laboratory for Marine Drugs and Bioproducts of Qingdao National Laboratory for Marine Science and Technology, Qingdao 266003, China

<sup>3</sup> Innovation Center for Marine Drug Screening & Evaluation, Qingdao National Laboratory for Marine Science and Technology, Qingdao 266003, China

\* Correspondence: ryu@ouc.edu.cn; Tel.: +86-138-6986-2306

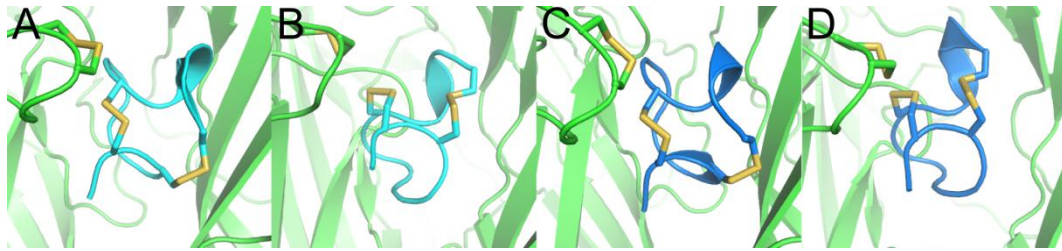

**Figure S1.** Binding mode of  $\alpha$ -ImI monomer and dimer. (A, B) represent the binding mode of  $\alpha$ -ImI of the dimer (light blue) with ha7 nAChR, and (C, D) represent the binding mode of  $\alpha$ -ImI monomer (deep blue) with the same binding sites of ha7 nAChR.

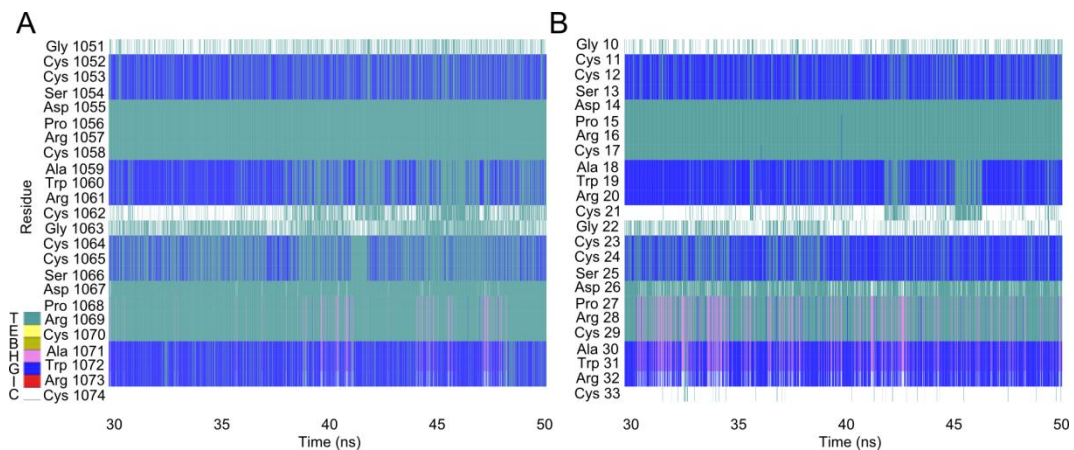

**Figure S2.** Characterization chart of secondary structure of each  $\alpha$ -ImI in  $2\times$ ImI-dendrimer. A represents the secondary structure diagram of two  $\alpha$ -ImI monomers. B represents the secondary structure diagram of two  $\alpha$ -ImI in  $2\times$ ImI-dendrimer. Color key for secondary structure plots are as follows: T (Turn); E (Extended configuration); B (Isolated bridge); H (Alpha helix); G (3-10 Helix); I (Pi-helix); C (coil).

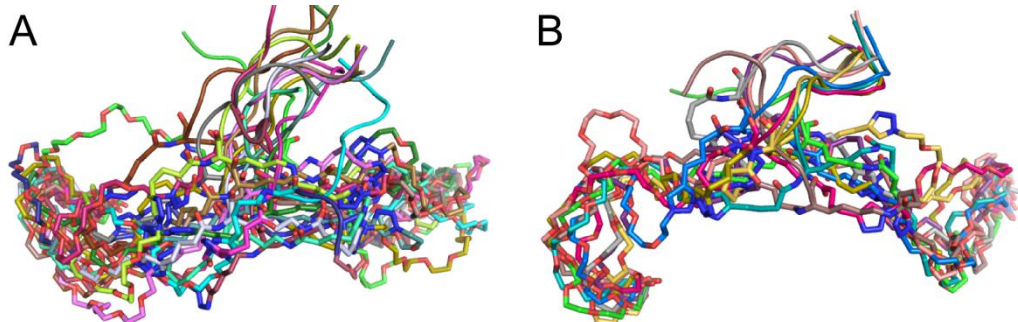

**Figure S3.** Conformational superposition diagram of the linker. (A) Frames extracted in the former 14 ns with even time intervals and the last frame (green) at 50ns. (B) The averagely extracted frames from 14th ns to 34th ns and the last frame (green) in 50ns.

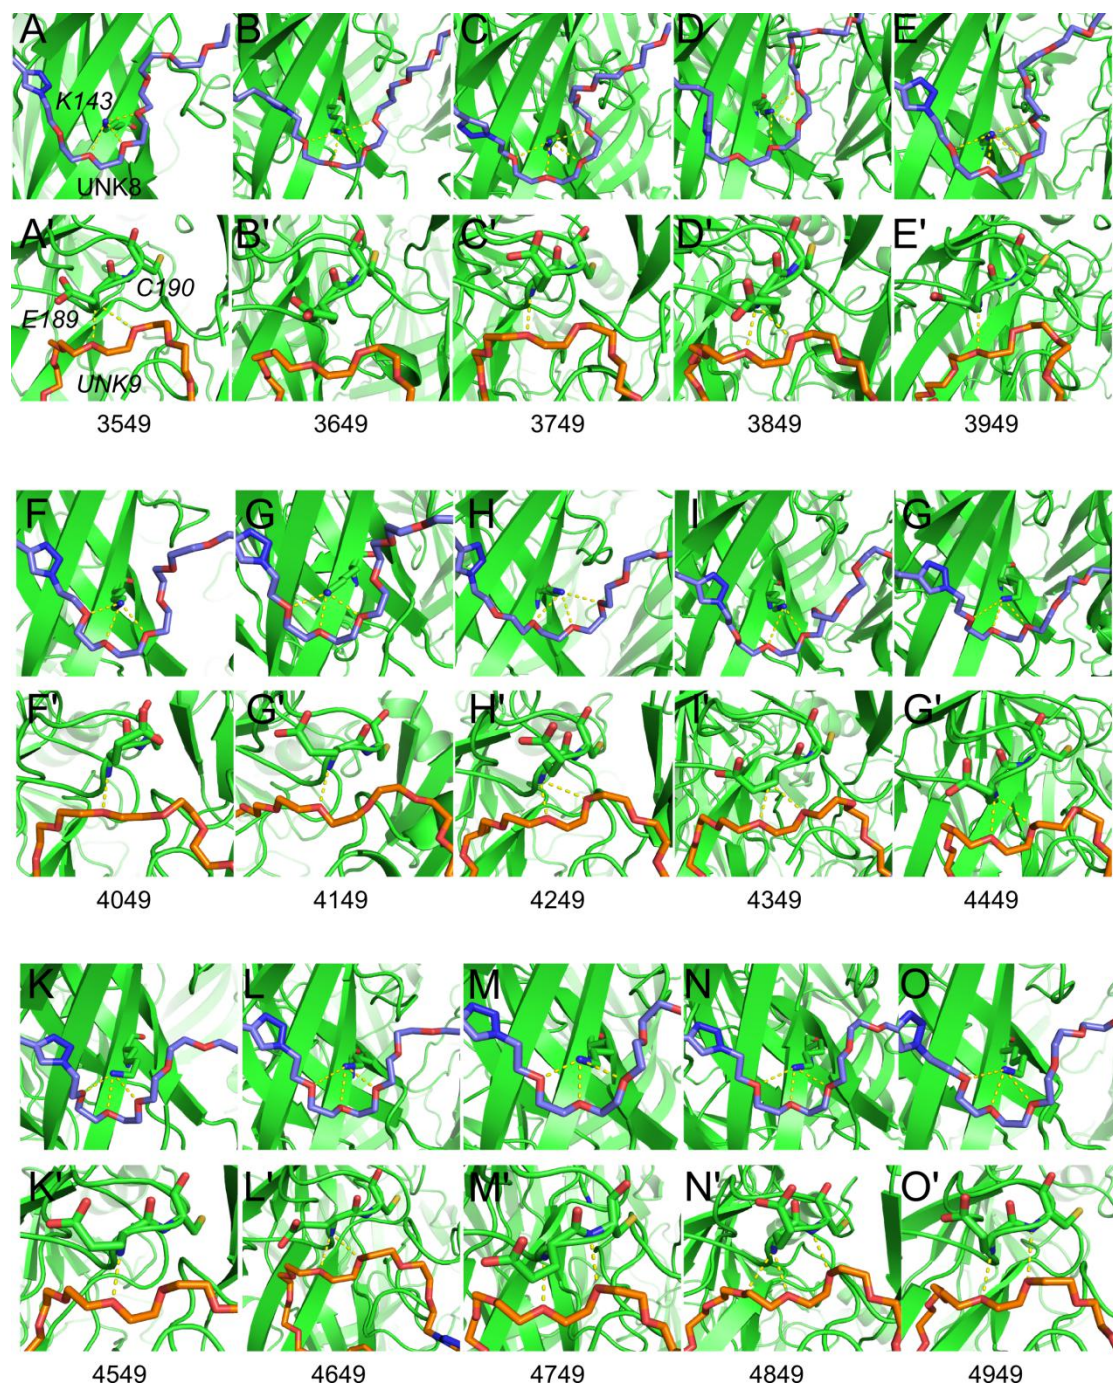

**Figure S4.** Cluster analysis diagram of the linker between 34 ns to 50 ns. 3549 - 4949 represent the extracted conformation number. The  $\text{ha7}$  nAChR was shown in green and two parts of the linker was colored in orange (UNK9) and purple (UNK8), respectively.



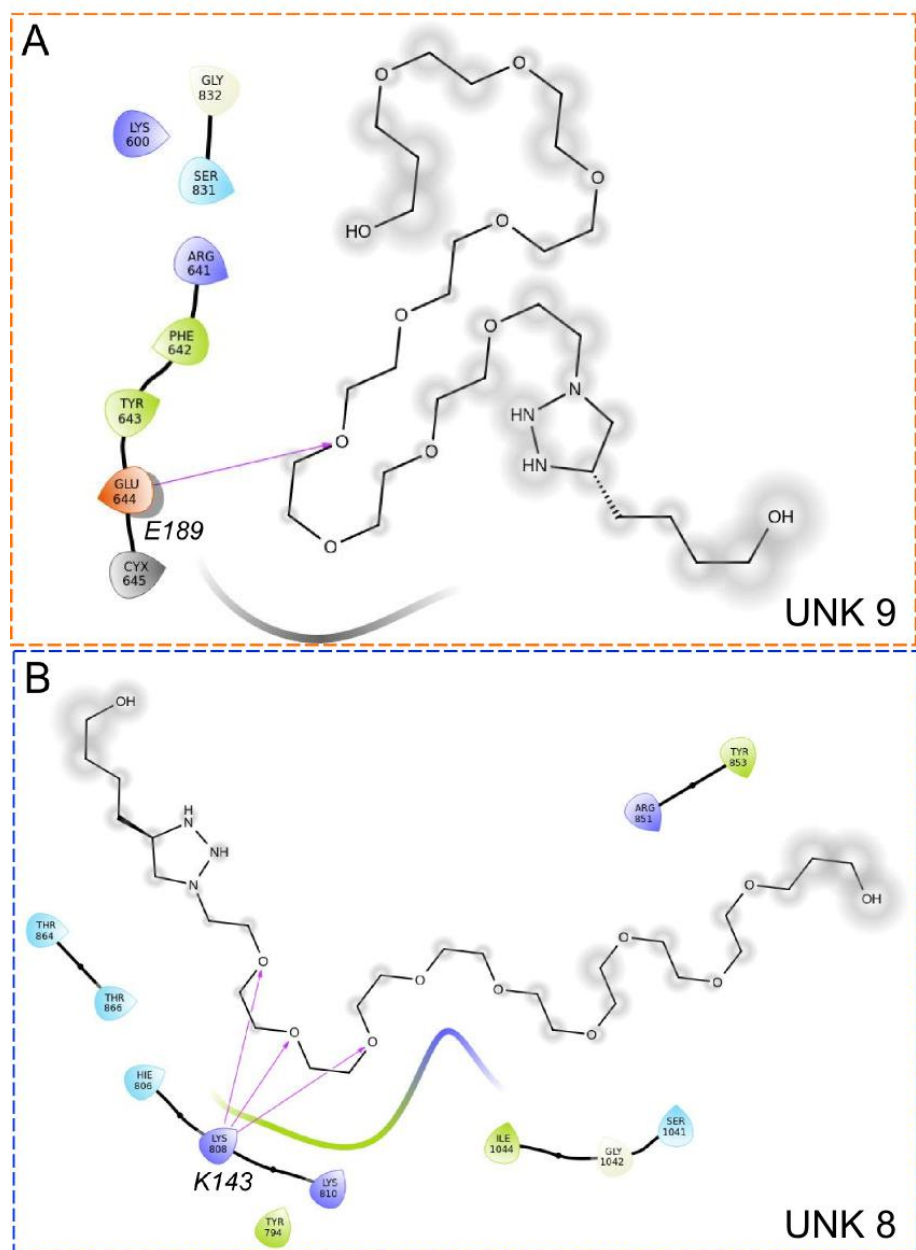

**Figure S5.** 2D interaction diagrams of the linker. (A) Binding mode of UNK9/ $\alpha$ 7-nAChR; (B) Binding mode of UNK8/ $\alpha$ 7-nAChR.

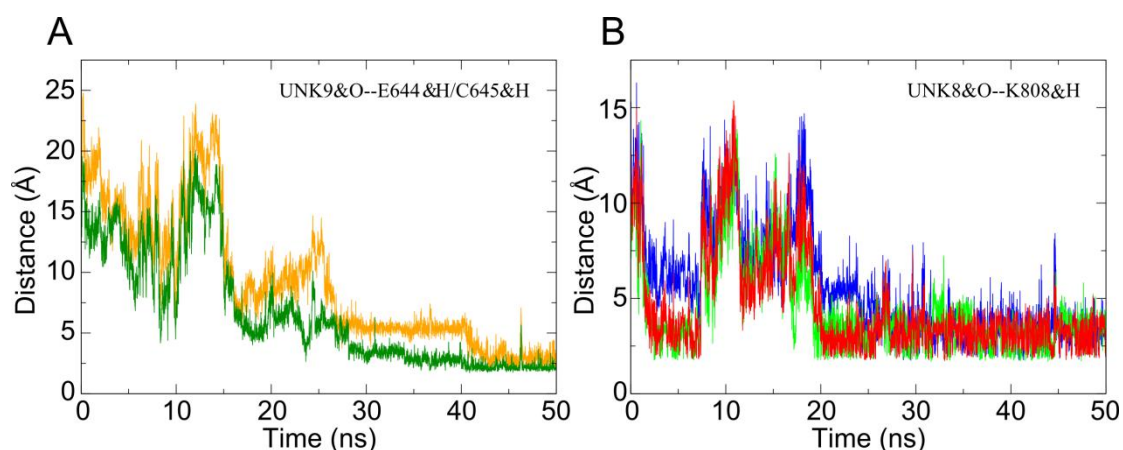

**Figure S6.** H-bond analysis of UNK with h $\alpha$ 7 nAChR. (A) Evolution of the distance between O atom of UNK9 and H atom of E644/C645 in h $\alpha$ 7 nAChR. (B) Evolution of the distance between O atom of UNK8 and H atom of K808 in h $\alpha$ 7 nAChR.

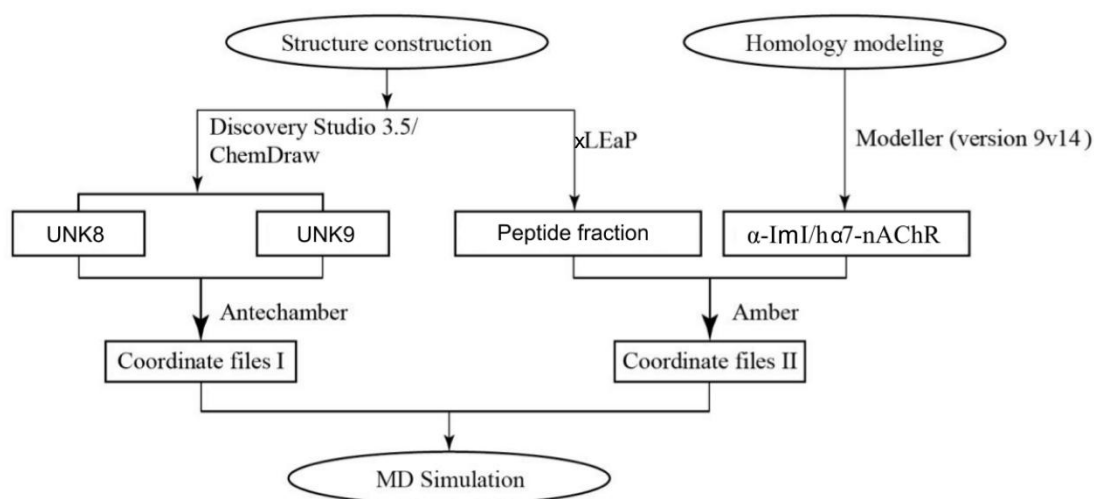

**Figure S7.** Flowchart for building the  $\alpha$ -ImI dendrimer model. The UNK8 and UNK9 represent the PEG spacer unit. The peptide fragment consists of 7 amino acid residues (Lys-Gly-Arg-Arg-Arg-Gly).

**Table S1.** Assigned partial charges for the UNK8/UNK9

| UNK8/UNK9.prepin      |         |     |  |
|-----------------------|---------|-----|--|
| 0                     | 0       | 2   |  |
| This is a remark line |         |     |  |
| molecule.res          |         |     |  |
| UNK                   | INT     | 0   |  |
| CORRECT               | OMIT DU | BEG |  |
| 0.0000                |         |     |  |

|    |      |    |   |    |    |    |       |         |          |           |
|----|------|----|---|----|----|----|-------|---------|----------|-----------|
| 1  | DUMM | DU | M | 0  | -1 | -2 | 0.000 | .0      | .0       | .00000    |
| 2  | DUMM | DU | M | 1  | 0  | -1 | 1.449 | .0      | .0       | .00000    |
| 3  | DUMM | DU | M | 2  | 1  | 0  | 1.523 | 111.21  | .0       | .00000    |
| 4  | C6   | C  | M | 3  | 2  | 1  | 1.540 | 111.208 | -180.000 | 0.564600  |
| 5  | O1   | O  | E | 4  | 3  | 2  | 1.209 | 119.705 | 7.057    | -0.527380 |
| 6  | C5   | CT | M | 4  | 3  | 2  | 1.519 | 117.177 | -173.884 | -0.199506 |
| 7  | H9   | HC | E | 6  | 4  | 3  | 1.116 | 107.629 | 57.858   | 0.069663  |
| 8  | H10  | HC | E | 6  | 4  | 3  | 1.116 | 107.529 | -58.215  | 0.069663  |
| 9  | C4   | CT | M | 6  | 4  | 3  | 1.537 | 114.565 | 179.857  | -0.077441 |
| 10 | H7   | HC | E | 9  | 6  | 4  | 1.117 | 109.340 | 58.080   | 0.055171  |
| 11 | H8   | HC | E | 9  | 6  | 4  | 1.117 | 109.386 | -59.553  | 0.055171  |
| 12 | C    | CT | M | 9  | 6  | 4  | 1.537 | 111.992 | 179.446  | -0.094750 |
| 13 | H3   | HC | E | 12 | 9  | 6  | 1.114 | 109.780 | 56.844   | 0.060668  |
| 14 | H4   | HC | E | 12 | 9  | 6  | 1.115 | 110.073 | -61.118  | 0.060668  |
| 15 | C8   | CV | M | 12 | 9  | 6  | 1.502 | 111.272 | 178.737  | 0.260462  |
| 16 | N    | NB | S | 15 | 12 | 9  | 1.267 | 122.016 | -115.407 | -0.355188 |
| 17 | N1   | NB | E | 16 | 15 | 12 | 1.257 | 104.933 | 179.323  | -0.165888 |
| 18 | C3   | CA | M | 15 | 12 | 9  | 1.338 | 127.535 | 63.866   | -0.222718 |
| 19 | H2   | H4 | E | 18 | 15 | 12 | 1.093 | 131.493 | 0.242    | 0.194897  |
| 20 | N2   | N* | M | 18 | 15 | 12 | 1.266 | 102.399 | -179.302 | 0.043377  |
| 21 | C1   | CT | M | 20 | 18 | 15 | 1.473 | 120.162 | 179.076  | 0.049274  |
| 22 | H5   | H1 | E | 21 | 20 | 18 | 1.116 | 110.956 | 30.268   | 0.079158  |
| 23 | H6   | H1 | E | 21 | 20 | 18 | 1.115 | 109.116 | 147.344  | 0.079158  |
| 24 | C7   | CT | M | 21 | 20 | 18 | 1.529 | 110.132 | -91.817  | 0.113340  |
| 25 | H11  | H1 | E | 24 | 21 | 20 | 1.114 | 109.960 | -61.576  | 0.046675  |
| 26 | H12  | H1 | E | 24 | 21 | 20 | 1.114 | 109.510 | 58.710   | 0.046675  |
| 27 | O    | OS | M | 24 | 21 | 20 | 1.407 | 109.017 | 178.315  | -0.429828 |
| 28 | C2   | CT | M | 27 | 24 | 21 | 1.407 | 112.341 | -178.986 | 0.128332  |
| 29 | H13  | H1 | E | 28 | 27 | 24 | 1.114 | 109.526 | -61.485  | 0.047675  |
| 30 | H14  | H1 | E | 28 | 27 | 24 | 1.116 | 109.333 | 58.349   | 0.047675  |
| 31 | C9   | CT | M | 28 | 27 | 24 | 1.522 | 109.014 | 178.067  | 0.128332  |
| 32 | H15  | H1 | E | 31 | 28 | 27 | 1.114 | 109.693 | -57.608  | 0.046176  |
| 33 | H16  | H1 | E | 31 | 28 | 27 | 1.115 | 110.309 | 63.073   | 0.046176  |
| 34 | O2   | OS | M | 31 | 28 | 27 | 1.406 | 108.370 | -177.015 | -0.429828 |
| 35 | C10  | CT | M | 34 | 31 | 28 | 1.406 | 112.860 | 177.797  | 0.128332  |
| 36 | H17  | H1 | E | 35 | 34 | 31 | 1.115 | 109.407 | -58.049  | 0.041678  |
| 37 | H18  | H1 | E | 35 | 34 | 31 | 1.115 | 109.565 | 62.036   | 0.041678  |
| 38 | C11  | CT | M | 35 | 34 | 31 | 1.522 | 108.309 | -177.522 | 0.123335  |
| 39 | H19  | H1 | E | 38 | 35 | 34 | 1.114 | 109.938 | -63.670  | 0.041178  |
| 40 | H20  | H1 | E | 38 | 35 | 34 | 1.113 | 109.162 | 56.107   | 0.041178  |
| 41 | O3   | OS | M | 38 | 35 | 34 | 1.407 | 109.029 | 176.390  | -0.421824 |
| 42 | C12  | CT | M | 41 | 38 | 35 | 1.409 | 113.310 | -174.532 | 0.129331  |
| 43 | H21  | H1 | E | 42 | 41 | 38 | 1.116 | 106.727 | -158.010 | 0.062667  |
| 44 | H22  | H1 | E | 42 | 41 | 38 | 1.113 | 110.409 | -41.714  | 0.062667  |

|    |     |    |   |    |    |    |       |         |          |           |
|----|-----|----|---|----|----|----|-------|---------|----------|-----------|
| 45 | C13 | CT | M | 42 | 41 | 38 | 1.523 | 111.371 | 83.423   | 0.091352  |
| 46 | H23 | H1 | E | 45 | 42 | 41 | 1.110 | 110.550 | -61.618  | 0.035681  |
| 47 | H24 | H1 | E | 45 | 42 | 41 | 1.115 | 109.777 | 58.755   | 0.035681  |
| 48 | O4  | OS | M | 45 | 42 | 41 | 1.408 | 108.795 | 178.286  | -0.417821 |
| 49 | C14 | CT | M | 48 | 45 | 42 | 1.409 | 113.469 | 177.905  | 0.128332  |
| 50 | H25 | H1 | E | 49 | 48 | 45 | 1.117 | 106.522 | 160.760  | 0.062667  |
| 51 | H26 | H1 | E | 49 | 48 | 45 | 1.112 | 110.385 | 44.714   | 0.062667  |
| 52 | C15 | CT | M | 49 | 48 | 45 | 1.523 | 111.807 | -80.724  | 0.097348  |
| 53 | H27 | H1 | E | 52 | 49 | 48 | 1.113 | 110.886 | 64.780   | 0.034682  |
| 54 | H28 | H1 | E | 52 | 49 | 48 | 1.115 | 109.961 | -56.210  | 0.034682  |
| 55 | O5  | OS | M | 52 | 49 | 48 | 1.408 | 108.687 | -175.881 | -0.425826 |
| 56 | C16 | CT | M | 55 | 52 | 49 | 1.408 | 112.424 | -179.241 | 0.127332  |
| 57 | H29 | H1 | E | 56 | 55 | 52 | 1.115 | 109.740 | -60.479  | 0.045176  |
| 58 | H30 | H1 | E | 56 | 55 | 52 | 1.115 | 109.127 | 58.977   | 0.045176  |
| 59 | C17 | CT | M | 56 | 55 | 52 | 1.521 | 109.403 | 178.355  | 0.128332  |
| 60 | H31 | H1 | E | 59 | 56 | 55 | 1.115 | 109.310 | -172.858 | 0.045176  |
| 61 | H32 | H1 | E | 59 | 56 | 55 | 1.115 | 110.178 | -52.928  | 0.045176  |
| 62 | O6  | OS | M | 59 | 56 | 55 | 1.408 | 109.360 | 67.856   | -0.429828 |
| 63 | C18 | CT | M | 62 | 59 | 56 | 1.407 | 112.347 | 179.391  | 0.128332  |
| 64 | H33 | H1 | E | 63 | 62 | 59 | 1.114 | 109.460 | -58.834  | 0.041178  |
| 65 | H34 | H1 | E | 63 | 62 | 59 | 1.116 | 109.424 | 60.994   | 0.041178  |
| 66 | C19 | CT | M | 63 | 62 | 59 | 1.521 | 108.906 | -178.794 | 0.130331  |
| 67 | H35 | H1 | E | 66 | 63 | 62 | 1.114 | 110.080 | -61.267  | 0.042178  |
| 68 | H36 | H1 | E | 66 | 63 | 62 | 1.116 | 109.801 | 59.293   | 0.042178  |
| 69 | O7  | OS | M | 66 | 63 | 62 | 1.407 | 108.554 | 178.873  | -0.430828 |
| 70 | C20 | CT | M | 69 | 66 | 63 | 1.406 | 112.682 | -178.883 | 0.130331  |
| 71 | H37 | H1 | E | 70 | 69 | 66 | 1.115 | 109.522 | -60.139  | 0.042677  |
| 72 | H38 | H1 | E | 70 | 69 | 66 | 1.115 | 109.449 | 59.807   | 0.042677  |
| 73 | C21 | CT | M | 70 | 69 | 66 | 1.521 | 108.590 | 179.754  | 0.128332  |
| 74 | H39 | H1 | E | 73 | 70 | 69 | 1.115 | 109.866 | -59.106  | 0.040678  |
| 75 | H40 | H1 | E | 73 | 70 | 69 | 1.115 | 109.927 | 61.329   | 0.040678  |
| 76 | O8  | OS | M | 73 | 70 | 69 | 1.407 | 108.812 | -178.791 | -0.428827 |
| 77 | C22 | CT | M | 76 | 73 | 70 | 1.407 | 112.520 | -179.830 | 0.128332  |
| 78 | H41 | H1 | E | 77 | 76 | 73 | 1.115 | 109.172 | -59.713  | 0.044177  |
| 79 | H42 | H1 | E | 77 | 76 | 73 | 1.114 | 109.766 | 59.951   | 0.044177  |
| 80 | C23 | CT | M | 77 | 76 | 73 | 1.522 | 109.174 | -179.279 | 0.128332  |
| 81 | H43 | H1 | E | 80 | 77 | 76 | 1.115 | 109.544 | 174.781  | 0.045676  |
| 82 | H44 | H1 | E | 80 | 77 | 76 | 1.115 | 110.076 | 54.732   | 0.045676  |
| 83 | O9  | OS | M | 80 | 77 | 76 | 1.407 | 109.192 | -65.791  | -0.432829 |
| 84 | C24 | CT | M | 83 | 80 | 77 | 1.407 | 112.586 | -179.879 | 0.138327  |
| 85 | H45 | H1 | E | 84 | 83 | 80 | 1.114 | 109.283 | -59.380  | 0.040678  |
| 86 | H46 | H1 | E | 84 | 83 | 80 | 1.115 | 109.216 | 60.602   | 0.040678  |
| 87 | C25 | CT | M | 84 | 83 | 80 | 1.529 | 108.548 | -179.338 | -0.206509 |
| 88 | H47 | HC | E | 87 | 84 | 83 | 1.116 | 109.500 | -58.956  | 0.082656  |

|    |     |    |   |    |    |    |       |         |          |           |
|----|-----|----|---|----|----|----|-------|---------|----------|-----------|
| 89 | H48 | HC | E | 87 | 84 | 83 | 1.116 | 109.479 | 59.198   | 0.082656  |
| 90 | C26 | C  | M | 87 | 84 | 83 | 1.519 | 114.477 | -179.881 | 0.566599  |
| 91 | O10 | O  | E | 90 | 87 | 84 | 1.210 | 122.796 | 0.576    | -0.526379 |

LOOP

N2 N1

IMPROPER

-M C5 C6 O1

C3 C C8 N

C8 H2 C3 N2

C3 C1 N2 N1

+M C25 C26 O10

DONE

STOP
